**1 Genomic diversity and evolution of coronavirus (SARS-CoV-2) in France from 309 COVID-19-**  
**2 infected patients**

3

**4 Anthony LEVASSEUR<sup>1,2,3#</sup>, Jeremy DELERCE<sup>1,2</sup>, Aurelia CAPUTO<sup>1,2</sup>, Ludivine**  
**5 BRECHARD<sup>1,2</sup>, Philippe COLSON<sup>1,2</sup>, Jean-Christophe LAGIER<sup>1,2</sup>, Pierre-Edouard**  
**6 FOURNIER<sup>2,4</sup>, Didier RAOULT<sup>1,2#</sup>**

7

**8 <sup>1</sup> Aix-Marseille Université (AMU), MEPHI (Microbes, Evolution, Phylogeny and Infections), IRD,**  
**9 APHM, Faculté de Médecine, Marseille, France**

**10 <sup>2</sup> IHU Méditerranée Infection, Marseille, France**

**11 <sup>3</sup> Institut Universitaire de France, Paris, France**

**12 <sup>4</sup> Aix-Marseille Université (AMU), IRD, APHM, SSA, VITROME, Marseille, France**

**13 # Corresponding authors: Didier Raoult: [didier.raoult@gmail.com](mailto:didier.raoult@gmail.com); Anthony Levasseur :**  
**14 [anthony.levasseur@univ-amu.fr](mailto:anthony.levasseur@univ-amu.fr)**

**15 Data deposition: genomes were deposited at EMBL-EBI under the BioProject: PRJEB37722**

16

17

18

19

20

21

22

## 23 ABSTRACT

24 The novel coronavirus (SARS-CoV-2) causes pandemic of viral pneumonia. The evolution and  
 25 mutational events of the SARS-CoV-2 genomes are critical for controlling virulence, transmissibility,  
 26 infectivity, severity of symptoms and mortality associated to this infectious disease. We collected and  
 27 investigated 309 SARS-CoV-2 genomes from patients infected in France. Detailed genome  
 28 cartography of all mutational events (SNPs, indels) was reported and correlated to clinical features of  
 29 patients. A comparative analysis between our 309 SARS-CoV-2 genomes from French patients and  
 30 the reference Wuhan coronavirus genome revealed 315 substitution mutations and six deletion events:  
 31 ten were in 5'/3' UTR, 178 were nonsynonymous, 126 were synonymous and one generated a stop  
 32 codon. Six different deleted areas were also identified in nine viral variants. In particular, 30  
 33 substitution mutations (18 nonsynonymous) and one deletion ( $\Delta$ 21765-21770) concerned the spike S  
 34 glycoprotein. An average of 7.8 mutational events ( $\pm$  1.7 SD) and a median of 8 (range, 7-9) were  
 35 reported per viral isolate. Comparative analyses and clustering of specific mutational signatures in 309  
 36 genomes disclose several divisions in groups and subgroups combining their geographical and  
 37 phylogenetic origin. Clinical outcomes of the 309 COVID-19-infected patients were investigated  
 38 according to the mutational signatures of viral variants. These findings highlight the genome dynamics  
 39 of the coronavirus 2019-20 and shed light on the mutational landscape and evolution of this virus.  
 40 Inclusion of the French cohort enabled us to identify 161 novel mutations never reported in SARS-  
 41 CoV-2 genomes collected worldwide. These results support a global and continuing surveillance of the  
 42 emerging variants of the coronavirus SARS-CoV-2.

43 **Keywords:** French cohort, SARS-CoV-2, coronavirus, evolution, bioinformatics, outbreak,  
 44 phylogeny, COVID-19 infected patients

45

46

47

## 48 INTRODUCTION

49 The new coronavirus SARS-CoV-2 has now spread to every country in the world. SARS-CoV-2 is  
 50 classified among the positive-sense single-stranded (ss)RNA viruses as the seventh coronavirus known  
 51 to infect human<sup>1</sup>. Four genera of coronaviruses have been identified in the subfamily  
 52 Orthocoronavirinae of the Coronaviridae family (order Nidovirales). Described for the first time in  
 53 December 2019 in Wuhan, China, the new SARS-CoV-2 coronavirus will naturally accumulate and  
 54 fix mutations in its RNA genome as the epidemic evolves, partly due to the high immunological  
 55 pressure in humans. A number of characteristics of coronaviruses are still unknown and one of the key  
 56 questions is how fast is the SARS-CoV-2 virus evolving? Indeed, mutations could drastically result in  
 57 difference in virulence, transmissibility, and clinical evolution. Therefore, the frequency and pattern of  
 58 mutations are essential features to be considered in this ongoing global epidemic.

59 The genome of SARS-CoV-2 is a positive ssRNA of approximately 29.9 kbases in length, with a  
 60 5'cap structure and 3'polyadenine tail<sup>2</sup>. Two large ORFs are translated into polyproteins arising from  
 61 ribosomal frameshift that are subsequently post-translationally processed to produce 16 proteins  
 62 conserved between coronaviruses<sup>3</sup>. These 16 proteins are involved in the synthesis of viral RNA and  
 63 immune evasion<sup>4</sup>. Four structural proteins (spike S, envelope E, membrane M and nucleocapsid N)  
 64 and at least nine small accessory proteins, including proteins unique to SARS-CoV-2, are produced  
 65 during viral genome replication<sup>3,5</sup>.

66 By comparing alpha- and beta-coronaviruses, it appears that SARS-CoV-2 exhibits notable genomic  
 67 features such as an optimized binding to the human receptor ACE2 and a functional polybasic (furin)  
 68 site in the spike protein with predicted O-linked glycans<sup>6</sup>. The receptor binding domain (RBD)  
 69 exhibits the most variable fraction of the genome of SARS-CoV-2 (only ~40% amino acid identity  
 70 with other SARS-CoV coronaviruses). The origin of this virus is debated but two main hypotheses  
 71 emerged based on either the natural selection in an animal host before zoonotic transfer or natural  
 72 selection in humans following zoonotic transfer<sup>7</sup>. Nearly identical RBDs found in pangolins  
 73 coronaviruses and SARS-CoV-2 could indicate an acquisition in SARS-CoV-2 by recombination and

74 mutations in a parsimonious scenario<sup>6</sup>. Metagenomic sequencing identified coronaviruses close to  
75 SARS-CoV-2 from Malayan pangolin and confirmed the natural reservoir of this virus in wild animals  
76 and the risk of zoonotic transmission<sup>8</sup>.

77 Being a RNA virus, SARS-CoV-2 is prone to mutate because of the lack of proofreading activity of  
78 polymerase. Previous work in SARS-CoV reported an exoribonuclease domain (ExoN) in non-  
79 structural protein 14 that could provide proofreading activity protecting the virus from high rate of  
80 mutagenesis<sup>9</sup>. Mutations have to be carefully studied and related to the severity of symptoms and  
81 clinical evolution associated to patients. In addition, the mutation rate correlates with drug resistance  
82 and escape from immune surveillance. The emerging respiratory disease outbreaks caused by the  
83 SARS-CoV-2 required an urgent need for comprehensive studies that combine genomic data,  
84 epidemiological data, and chart records of the clinical symptoms and clinical evolution of patients. In  
85 addition to genomic mutations, transcriptomic studies have revealed several viable deletions in  
86 essential proteins, including glycoprotein S reinforcing that several regions are prone to mutate<sup>10</sup>.

87 The 2019–20 coronavirus pandemic was confirmed to have spread to France since January 2020. In  
88 this work, 309 genomes of SARS-CoV-2 from French patients monitored in IHU Méditerranée  
89 Infection were studied and compared to the isolates from different countries in all continents.  
90 Mutational events were evidenced and compared to the reference Wuhan coronavirus isolate. Finally,  
91 clinical issues and impacts of these mutations were investigated.

## 92 **RESULTS**

### 93 **Mutational landscape of the SARS-CoV-2 genomes from the French cohort**

94 The mutational landscape of 309 coronavirus genomes was tracked in terms of SNPs and  
95 insertions/deletions (Table 1). As compared to the reference genome SARS-CoV-2 isolated in Wuhan  
96 in December 2019, a total of 321 mutational events were reported in the SARS-CoV-2 genomes from  
97 309 patients. A mean of 7.8 mutational nucleotide substitutions (+/- 1.7 SD) and a median of 8 (range,  
98 7-9) were reported per viral isolate. Ten substitutions were retrieved in the non-coding part of the  
99 genome. In the coding region, 305 nucleotide substitutions were detected representing 178

nonsynonymous (~58.4%) and 126 synonymous mutations (~41.3%) and one stop codon mutation (~0.3%). Some mutations were commonly distributed in the majority of our isolates whereas 208 substitutions (~68.2%) were unique to one isolate. Regarding missense mutations, we noted drastic changes of aminoacid (AA) in which the physicochemical properties of the AA were severely interfered (Table 2). In particular, the spike gene contained 30 substitutions (18 nonsynonymous, 60%) and included one deletion of six nucleotides ( $\Delta$ 21765-21770). Among mutations retrieved in the spike gene, the missense mutation P330S (22550, CCT>TCT) was embedded at the border of the receptor-binding domain (RBD). A stop mutation was also found in ORF7a at the protein position 38, meaning that the protein was prematurely truncated at the first third of its sequence.

Interestingly, we identified six putative deleted regions distributed in nine viral variants among the genes nsp1, nsp2, spike S, ORF3a and ORF7a. These deletions removed entire codons for nsp1 ( $\Delta$ 510-518 and  $\Delta$ 686-694, three AA), nsp2 ( $\Delta$ 1605-1607, one AA), spike protein ( $\Delta$ 21765-21770, two AA), ORF7a ( $\Delta$ 27434-27436, one AA) and consequently, conserved open reading frames. Moreover, the deletion event retrieved in nsp1 (position  $\Delta$ 686-694) was found in three different patients and the deletion in nsp2 (position  $\Delta$ 1605-1607) in two different patients that were not epidemiologically-related, meaning that these two evolutionary events could be a convergent evolution of the virus. In addition, one single nucleotide deletion impacted ORF3a at the position  $\Delta$ 26161, this frameshift mutation lead to a truncated protein missing 19 AA with a stop codon generated at the protein position 259.

The occurrence of specific mutations in the 309 genomes was studied and classified. In order to organize our dataset into meaningful groups and identify coherent patterns, a double hierarchical clustering of the detected mutations was generated (Figure 1). The hierarchical clustering revealed preponderant mutations shared by a majority of the isolates. It divided our 309 patients into five main clusters corresponding to specific mutational signatures. Regarding the clustering of mutational events, we detected the presence and co-occurrence of specific mutations in different clusters (Figure 1). Among the main clusters, we pointed the cluster 1 (44 patients, 14.2%, positions [28881-28882-28883]) with two nonsynonymous mutations in protein N (R203K; G204R). Cluster 2 (39 patients,

12.6%, position 15324) contains a synonymous mutation (C15324T). Cluster 3 (126, 100 and 211 patients, at positions 2416, 8371, 25563, respectively) includes one synonymous mutation (C2416T), and two nonsynonymous mutations (nsp3: Q1884H; ORF3a: Q57H). Cluster 4 (68 patients, 22%, position 1059) contains one nonsynonymous mutation (nsp2: T85I). Finally, cluster 5 (from 297 to 303 patients, 96-98%, positions 241, 3037, 14408, 23403) displays one mutation in 5'UTR (C241T), one synonymous mutation (C3037T) and two nonsynonymous mutations (nsp12b: P314L, S protein D614G).

The genomes of all 309 isolates were integrated in a global phylogenetic reconstruction including all other 200 genomes of SARS-CoV-2 available in France (Figure 2 + supplementary figure 1). We observed different clades corresponding to the previous mutational patterns revealed by the hierarchical clustering. These mutations were positioned in phylogenetic trees. Globally, the distribution of the 309 SARS-CoV-2 genomes from our patients was distributed across all lineages. Noteworthy, we observed a high density of isolates from our cohort in the cluster 3a corresponding to the mutation nsp3: G8371T, Q1884H. Phylogenetic reconstruction was also carried out including all complete genomes available worldwide (5519 genomes on 15<sup>th</sup> April 2020). All viral isolates of our French cohort were mainly distributed in clades including European isolates (Figure 3). Again, the mutation in the cluster 3a (nsp3: G8371T, Q1884H) regrouped almost exclusively the variants from our French cohort (98/105 genomes). Compared to the Chinese reference, we observed a prevalent distribution of specific mutations at positions 241, 3037, 14808 and 23403 that spread in approximately ~3570 (+/-7) genomes representing ~64.6 % of the isolates worldwide. These mutations have been reported in variants from all continents. Although, we detected some clades depending on the common geographical origin of the patients, a global distribution of variants in all continents was observed, therefore meaning and confirming that SARS-CoV-2 is circulating worldwide.

Clinical outcomes of the 309 COVID-19-infected patients were investigated and integrated in our evolutionary analyses (Figure 1-3). Among these patients, we classified the outcomes in three categories including poor clinical outcome (PClinO, defined by either death or transfer to intensive care unit or hospitalization for 10 days or more), poor virological outcome (PVirO, defined by viral

shedding persistence at day 10) and good clinical outcome (GO) (Supplementary Table 1).  
 Coronavirus genomes isolates from 38 patients' isolates with PVirO were widely distributed across the  
 groups, including diverse mutational events meaning that no correlation between higher viral loads  
 and the genomic specificity of the virus was evidenced as previously reported (supplementary figure  
 2). For the 10 patients with PClinO, a majority of isolates were also distributed to all groups  
 (supplementary figure 2). An exception concerned two patients (IHUCOVID-0318, IHUCOVID-  
 0333) with one PClinO and one death that were clusterized together in a group of seven different  
 isolates. A common nonsynonymous mutation in the membrane protein M (L129M, CTG>ATG,  
 position 26907) was found in this cluster.

## DISCUSSION

Systematic gene level mutational analysis of the genomes allowed us to identify several unique  
 features of the SARS-CoV-2 genome. In this study, we reported 315 substitution mutations including  
 126 synonymous mutations. Although these later mutations conserved AA, it has been reported that  
 the fitness of RNA viruses with genomes harboring synonymous mutations could be affected<sup>11</sup>.  
 Regarding the 178 nonsynonymous mutations, alteration due to the replacement of specific AA  
 depends on several factors including their physicochemical properties, steric hindrance and the  
 position of the AA in the tridimensional structure of the resulting protein. A key element of  
 coronavirus host range is determined by the binding affinity between the spike S protein and the  
 cellular receptor<sup>12</sup>. Here, thirty substitution mutations (including 18 nonsynonymous) were reported in  
 the spike protein S. The spike protein mediates viral entry into host cells by recognizing angiotensin-  
 converting enzyme 2 (ACE2) as its receptor<sup>13</sup>. We detected a missense mutation P330S (CCT>TCT)  
 located at the border of the RBD<sup>14</sup>. Furthermore, a deletion of six nucleotides  $\Delta$ 21765-21770 removed  
 two AA in the resulting protein. Mutations in the spike surface glycoprotein (A930V (24351C>T))  
 have already been reported in the Indian SARS-CoV-2<sup>15</sup>. All these mutations in protein S could  
 influence host range and transmissibility of the virus. Consequently, the spike S glycoprotein is a  
 potential target among potential therapeutic strategies. Focusing on the mutations identified in our  
 study enables to drive the strategy to target special positions of the protein. In this line, specific

antiviral therapies on S protein should be conducted *in vitro* (involving RBD-ACE2 blockers, S cleavage inhibitors, neutralizing antibodies, inhibitors and small interfering)<sup>16</sup>. Additionally, truncated proteins were also detected for ORF7a with a stop codon mutation (position 38 on 122 AA protein length) and for ORF3a with a frameshift mutation leading to an aborted protein missing 19 terminal AA. These mutations represent major changes in the protein architecture that have to be experimentally tested in order to assess the impact on protein function.

In evolutionary biology, convergent evolution is a central concept. The importance of a mutation is greatly strengthened if one can show that the fitness has evolved independently multiple times<sup>17</sup>. Two deletion events ( $\Delta 686-694$ ;  $\Delta 1605-1607$ ) were detected in three and two variants while the COVID-19-infected patients were not epidemiologically-related. These results strongly support a convergent evolution and could suggest convergent adaptation of the virus.

Phylogenetic trees were reconstructed by including isolates from France and all isolates worldwide. Isolates were grouped according to continents, but the large circulation of the virus was evidenced. Interestingly, we detected only two isolates belonging to the S-type in our 309 patients' cohort<sup>18</sup>. Noteworthy, an almost exclusive group including SARS-CoV-2 genomes from 98 patients monitored in IHU Méditerranée Infection was phylogenetically close and regrouped in a clade of 105 genomes. Classification based on mutation profiles enables the inclusion of patients in specific groups and correlates this clustering with the clinical features in order to favor a better approach to treatments. We reported widespread variants that extent to different groups and pointed five clustering groups that spread to different lineages. Regarding the clinical evolution of patients, PClinO and PVirO were widely distributed in all groups identified in our clustering analysis as well as in the phylogenetic trees as previously observed<sup>19</sup>. A single exception was reported in a subgroup with a missense mutation in the gene encoding membrane protein M (L129M, CTG>ATG) in which two PClinO (including on death) were observed. This specific mutation in membrane protein M (L129M) has to be carefully investigated in future large cohort as potential determinant of clinical evolution. But at this stage, more data have to be integrated to state any conclusion or consequence about this mutation. Overall, these



results suggested a clinical outcome that is not dependent on viral variants but rather a patient-dependent clinical outcome.

In conclusion, the mutational signatures and evolution of the coronavirus SARS-CoV-2 from 309 patients monitored in IHU Méditerranée Infection were unraveled. Inclusion of the French cohort allowed us to identify 161 novel mutations never reported before in coronavirus isolates worldwide. This mutations list represents a huge library of potential targets to test experimentally. The isolation and the genomic studies of the 309 SARS-CoV-2 genomes are paving the way for new diagnostic, therapeutic and prophylactic approaches.

## **METHODS**

### **Patients**

The study was conducted at Assistance Publique-Hôpitaux de Marseille (AP-HM), Southern France in the Institut Hospitalo-Universitaire (IHU) Méditerranée Infection (<https://www.mediterranee-infection.com/>). All data from patients were anonymized. The study was conducted on patients included from February 29<sup>th</sup> to April 4<sup>th</sup>. Individuals with PCR-documented SARS-CoV-2 RNA from a nasopharyngeal sample<sup>20</sup> were selected for genome sequencing. Viral loads ranged as follows: 93 patients with PCR Ct <16; 69 patients with [16<Ct<17]; 95 patients with [17<Ct<18]; 30 patients with [18<Ct<19]; 17 patients with [19<Ct<20] and 5 patients with Ct >20.

### **Genome sequencing and assembling**

From nasopharyngeal samples, genomic RNA was extracted using the EZ1 biorobot with the EZ1 DNA tissue kit (Qiagen, Hilden, Germany) as previously described<sup>21</sup>. In the reverse transcription (RT) step, cDNA was reverse transcribed from total viral RNA samples using TaqMan Reverse Transcription (Life technologies applied biosystems) following the manufacturer's recommendations. PCR program was set as follows: 25°C, 10 min, 48°C, 30 min, 95°C, 5 min, 4°C. DNA Polymerase I Large Klenow Fragment (BioLabs) was used for generating double stranded cDNA. 20 µL of each sample were added to a mix (10 µL) of: Buffer 2 Neb 10X, DNA polymerase large Klenow Fragment,

dNTPs working solution (10mM) for 1 h at 37°C. cDNA were purified using beads Agencourt AMPure (Beckman Coulter) and then sequenced with the paired end strategy on a MiSeq sequencer (Illumina Inc, San Diego, CA,USA) with the Nextera XT DNA sample prep kit (Illumina). To prepare the paired-end library, the « tagmentation » step fragmented and tagged the DNA. Then, limited cycle PCR amplification (12 cycles) completed the tag adapters and introduced dual-index barcodes. After purification on AMPure XP beads (Beckman Coulter Inc, Fullerton, CA, USA), libraries were normalized on specific beads according to the Nextera XT protocol (Illumina). Normalized libraries were pooled into a single library for sequencing on MiSeq. The pooled single strand library was loaded onto the reagent cartridge and then onto the instrument along with the flow cell. Automated cluster generation and paired-end sequencing with dual index reads were performed in single 39-hours run in 2x250-bp as previously described<sup>21,22</sup>. After sequencing, reads were mapped on the reference SARS-CoV-2 isolate Wuhan-Hu-1 (MN908947.3) using CLC Genomics workbench v.7 with the following thresholds: 0.8 for coverage and 0.9 for similarity. For each sample, detailed per-base coverage information was extracted and all mutations with a coverage  $\geq 5$  were considered.

## **Hierarchical clustering**

Data were ordered and grouped using the distance matrix computation and hierarchical clustering analysis calculated by MultiExperimentViewer<sup>23</sup>. A double clustering was carried out based on Pearson correlation as a distance matrix and complete linkage clustering as a linkage method.

## **Sequence dataset**

All genomes available on April 15 of SARS-CoV-2 were downloaded from GISAID (Global Initiative; <https://www.gisaid.org/>) with acknowledgment<sup>24,25</sup>. All genomes were deposited at EMBL-EBI under the BioProject: PRJEB37722

## **ABBREVIATIONS**

AA: Amino Acid

256 GO: good clinical outcome

257 Indel: Insertion and deletion

258 ORF: Open Reading Frame

259 PClinO: poor clinical outcome

260 PVirO: poor virological outcome

261 RBD: Receptor Binding Domain

262 SD: Standard Deviation

263 SNP: Single Nucleotide Polymorphism

264 UTR: Untranslated Transcribed Region

## 265 **ETHICS APPROVAL AND CONSENT TO PARTICIPATE**

266 The study was approved by the Ethical Committee of the University Hospital Institute Méditerranée  
267 Infection (N°: 2020-016). Informed consent was obtained from all patients. The study was performed  
268 in accordance to the good clinical practices recommended by the Declaration of Helsinki.

## 269 **AVAILABILITY OF DATA AND MATERIALS**

270 All genomes were deposited at EMBL-EBI under the BioProject: PRJEB37722

## 271 **COMPETING INTERESTS**

272 Authors declare no competing interests

## 273 **FUNDING**

274 This work was supported by a grant from the French State managed by the National Research Agency  
275 under the "Investissements d'avenir (Investments for the Future)" program with the reference ANR-  
276 10-IAHU-03 (Méditerranée Infection) and by the Région Provence-Alpes-Côte-d'Azur and the  
277 European funding FEDER PRIM1. This research was supported by a grant from the Institut  
278 Universitaire de France (IUF, Paris, France) allocated to Prof. Anthony Levasseur.

## 279 **AUTHOR'S CONTRIBUTIONS**

AL and DR supervised and conceived the project. AL designed the evolutionary studies and interpreted the data. AL and JD performed the experiments and analyzed the data. JCL, PEF, PC, AC, LB helped with data acquisition. AL wrote the manuscript. The authors read and approved the final manuscript.

## ACKNOWLEDGMENTS

Respectful thanks to all patients and their families enrolled in this study. The authors would like to thank all the engineers, technicians, and clinicians who contributed to this investigation. The authors gratefully acknowledge Olivia Ardizzoni, Vincent Bossi, Madeleine Carrara and Sofiane Regoui for help in sequencing the genomes. The authors acknowledge Yolande Obadia and Audrey Giraud-Gatineau for help in data acquisition. We gratefully thank the authors, the originating and submitting laboratories for their sequence and metadata shared through GISAID (Global Initiative; <https://www.gisaid.org/>). We acknowledge all the members of CoV-GLUE, Nextstrain (<https://nextstrain.org/>), and virological.org for sharing their analysis in real-time.

## REFERENCES

1. Corman VM, Muth D, Niemeyer D, Drosten, C. 2018. Hosts and Sources of Endemic Human Coronaviruses. *Adv. Virus Res.* 100:163–188.
2. Cascella M, Rajnik M, Cuomo A, Dulebohn SC, Di Napoli R. 2020. Features, Evaluation and Treatment Coronavirus (COVID-19). *StatPearls*. Treasure Island (FL).
3. Wu F, Zhao S, Yu B, Chen YM, Wang W, Song ZG, Hu Y, Tao ZW, Tian JH, Pei YY, Yuan ML, Zhang YL, Dai FH, Liu Y, Wang QM, Zheng JJ, Xu L, Holmes EC, Zhang YZ. 2020. A new coronavirus associated with human respiratory disease in China. *Nature*. 579:265-269.
4. Snijder EJ, Bredenbeek PJ, Dobbe JC, Thiel V, Ziebuhr J, Poon LL, Guan Y, Rozanov M, Spaan WJ, Gorbalenya AE. 2003. Unique and conserved features of genome and proteome of SARS-coronavirus, an early split-off from the coronavirus group 2 lineage. *J Mol Biol.* 331:991-1004.
5. Zhou P, Yang XL, Wang XG, Hu B, Zhang L, Zhang W, Si HR, Zhu Y, Li B, Huang CL, Chen HD, Chen J, Luo Y, Guo H, Jiang RD, Liu MQ, Chen Y, Shen XR, Wang X, Zheng XS, Zhao K, Chen QJ, Deng F, Liu LL, Yan B, Zhan FX, Wang YY, Xiao GF, Shi ZL. 2020. A pneumonia outbreak associated with a new coronavirus of probable bat origin. *Nature*. 579:270-273.
6. Andersen KG, Rambaut A, Lipkin WI, Holmes EC, Garry RF. 2020. The proximal origin of SARS-CoV-2. *Nat Med*. In press

- 310 7. Cui J, Li F, Shi ZL. Origin and evolution of pathogenic coronaviruses. 2019. *Nat. Rev. Microbiol.*  
311 **17**, 181–192.
- 312 8. Lam TS, Shum MH, Zhu HC, Tong YG, Ni XB, Liao YS, Wei W, Cheung WY, Li WJ, Li LF,  
313 Leung GM, Holmes EC, Hu YL, Guan Y. 2020. Identifying SARS-CoV-2 related coronaviruses in  
314 Malayan pangolins. *Nature*. In press
- 315 9. Smith EC, Blanc H, Vignuzzi M, Denison MR. 2013. Coronaviruses lacking exoribonuclease  
316 activity are susceptible to lethal mutagenesis: evidence for proofreading and potential therapeutics.  
317 *PLoS Pathog.* 9, e1003565
- 318 10. Davidson AD, Williamson MK, Lewis S, Shoemark D, Carroll MW, Heesom K, Zambon M, Ellis  
319 J, Lewis PA, Hiscox JA, Matthews DA. 2020. Characterisation of the transcriptome and proteome of  
320 SARS-CoV-2 using direct RNA sequencing and tandem mass spectrometry reveals evidence for a cell  
321 passage induced in-frame deletion in the spike glycoprotein that removes the furin-like cleavage site.  
322 *bioRxiv* (<https://doi.org/10.1101/2020.03.22.002204>)
- 323 11. Cuevas JM, Domingo-Calap P, Sanjuán R. 2012. The fitness effects of synonymous mutations in  
324 DNA and RNA viruses. *Mol Biol Evol.* 29:17-20.
- 325 12. Kuo L, Godeke GJ, Raamsman MJ, Masters PS, Rottier PJ. 2000. Retargeting of coronavirus by  
326 substitution of the spike glycoprotein ectodomain: crossing the host cell species barrier. *J. Virol.*  
327 **74**:1393-1406.
- 328 13. Li F, Li W, Farzan M, Harrison SC. 2005. Structure of SARS coronavirus spike receptor binding  
329 domain complexed with receptor. *Science.* 309,1864–1868.
- 330 14. Tai W, He L, Zhang X, Pu J, Voronin D, Jiang S, Zhou Y, Du L. 2020. Characterization of the  
331 receptor-binding domain (RBD) of 2019 novel coronavirus: implication for development of RBD  
332 protein as a viral attachment inhibitor and vaccine. *Cell Mol Immunol.* In press
- 333 15. Sardar R, Satish D, Birla S, Gupta D. 2020. Comparative analyses of SAR-CoV2 genomes from  
334 different geographical locations and other coronavirus family genomes reveals unique features  
335 potentially consequential to host-virus interaction and pathogenesis. *bioRxiv*, doi:  
336 <https://doi.org/10.1101/2020.03.21.001586>
- 337 16. Du L, He Y, Zhou Y, Liu S, Zheng B-J, Jiang S. 2009. The spike protein of SARS-CoVda target  
338 for vaccine and therapeutic development. *Nat Rev Microbiol.* 7:226e36.
- 339 17. Currie A. 2012. Convergence as evidence. *Brit. J. Phil. Sci.* 64,763–786.
- 340 18. Tang X, Wu C, Li X, Song Y, Yao X, Wu X, Duan Y, Zhang H, Wang Y, Qian Z, Cui J, Lu J.  
341 2020. On the origin and continuing evolution of SARS-CoV-2. *Natl Sci Rev.* 3:nwaa036
- 342 19. Million M, Lagier JC, Gautret P, Colson P, Fournier PE, Amrane S, Hocquart M, Mailhe M,  
343 Esteves-Vieira V, Doudier B, Aubry C, Correard F, Giraud-Gatineau A, Roussel Y, Berenger C,  
344 Cassir N, Seng P, Zandotti C, Dhiver C, Ravaux I, Tomei C, Eldin C, Tissot-Dupont H, Honoré S,  
345 Stein A, Jacquier A, Deharo JC, Chabrière E, Levasseur A, Fenollar F, Rolain JM, Obadia Y, Brouqui  
346 P, Drancourt M, La Scola B, Parola P, Raoult D. 2020. Early treatment of 1061 COVID-19 patients  
347 with hydroxychloroquine and azithromycin, Marseille, France. *Travel Med Infect Dis*, In press
- 348

20. Amrane S, Tissot-Dupont H, Doudier B, Eldin C, Hocquart M, Mailhe M, Dudouet P, Ormières E, Ailhaud L, Parola P, Lagier JC, Brouqui P, Zandotti C, Ninove L, Luciani L, Boschi C, La Scola B, Raoult D, Million M, Colson P, Gautret P. 2020. Rapid viral diagnosis and ambulatory management of suspected COVID-19 cases presenting at the infectious diseases referral hospital in Marseille, France, - January 31st to March 1st, 2020: A respiratory virus snapshot. *Travel Med Infect Dis.* 101632.

21. Colson P, Lagier JC, Baudoin JP, Bou Khalil J, La Scola B, Raoult D. Ultrarapid diagnosis, microscope imaging, genome sequencing, and culture isolation of SARS-CoV-2. *Eur J Clin Microbiol Infect Dis.* 2020. 1-3. doi:10.1007/s10096-020-03869-w

22. Tall ML, Ndongo S, Ngom II, Delerce J, Khelaifia S, Raoult D, Fournier PE, Levasseur A. *Massilimicrobiota timonensis* gen. nov., sp. nov., a new bacterium isolated from the human gut microbiota *New Microbes New Infect.* 2019 Sep; 31: 100574.

23. Saeed AI, Sharov V, White J, Li J, Liang W, Bhagabati N, Braisted J, Klapa M, Currier T, Thiagarajan M, Sturn A, Snuffin M, Rezantsev A, Popov D, Ryltsov A, Kostukovich E, Borisovsky I, Liu Z, Vinsavich A, Trush V, Quackenbush J. 2003. TM4: a free, open-source system for microarray data management and analysis. *Biotechniques.* 34: 374-378.

24. Elbe S, Buckland-Merrett G. 2017. Data, disease and diplomacy: GISAID's innovative contribution to global health. *Glob Chall.* 10:33-46.

25. Shu Y, McCauley J. 2017. GISAID: Global initiative on sharing all influenza data – from vision to reality. *EuroSurveillance.* 22(13).

## FIGURES, TABLES AND ADDITIONAL FILES

**Table 1. Mutational events detected in the 309 SARS-CoV-2 genomes as compared to the reference Wuhan coronavirus.**

**Table 2. Detailed mutations detected in the 309 SARS-CoV-2 genomes from French patients.**

**Figure 1. Double hierarchical clustering of mutational events in SARS-CoV-2 genomes collected in 309 COVID-19 infected French patients.** Top tree: Viral isolates from 309 patients. Left tree: Position of identified mutations according to the reference Wuhan genome. Clusters (1 to 5) were labeled with numbers ranging from 1 to 5. Missing positions were labeled in grey. The mutation type is represented by a colour scale from green (position identical to the reference), red (nonsynonymous mutation), orange (synonymous mutation) and blue (deleted position).

**Figure 2. Phylogenetic tree of coronavirus in France.** The phylogenetic tree was reconstructed from 509 viral genomes collected in France (309 from this study). Number represents the cluster

identified in the double hierarchical clustering. The reference Wuhan coronavirus isolate was underlined in purple. Red star corresponds to PClinO, blue star corresponds to PVirO, grey star corresponds to the loss of follow-up and green star corresponds to deceased patient. Main mutations were labeled along branches.

**Figure 3. Phylogenetic tree of coronavirus worldwide.** The phylogenetic tree was reconstructed from 5519 viral genomes collected around the world. Numbers (1 to 5) represent the cluster identified in the double hierarchical clustering. Red star corresponds to PClinO, blue star corresponds to PVirO, grey star corresponds to the loss of follow-up and green star corresponds to deceased patient.

**Supplementary Table 1. Baseline characteristics of the 309 COVID-19 infected patients.**

**Supplementary Figure 1. Emergence and phylogenetic tree of coronavirus in France.**

**Supplementary Figure 2. Phylogenetic tree of coronavirus from the cohort of 309 COVID-19 infected patients.** The phylogenetic tree was reconstructed from 309 viral genomes in this study. Numbers (1 to 5) represent the cluster identified in the double hierarchical clustering. The reference Wuhan coronavirus isolate was underlined in purple. Red star corresponds to PClinO, blue star corresponds to PVirO, grey star corresponds to the loss of follow-up and green star corresponds to deceased patient. Mutations were labeled along branches.

## AUTHOR INFORMATION

Correspondence to Didier Raoult [didier.raoult@gmail.com](mailto:didier.raoult@gmail.com) or Anthony Levasseur [anthony.levasseur@univ-amu.fr](mailto:anthony.levasseur@univ-amu.fr)

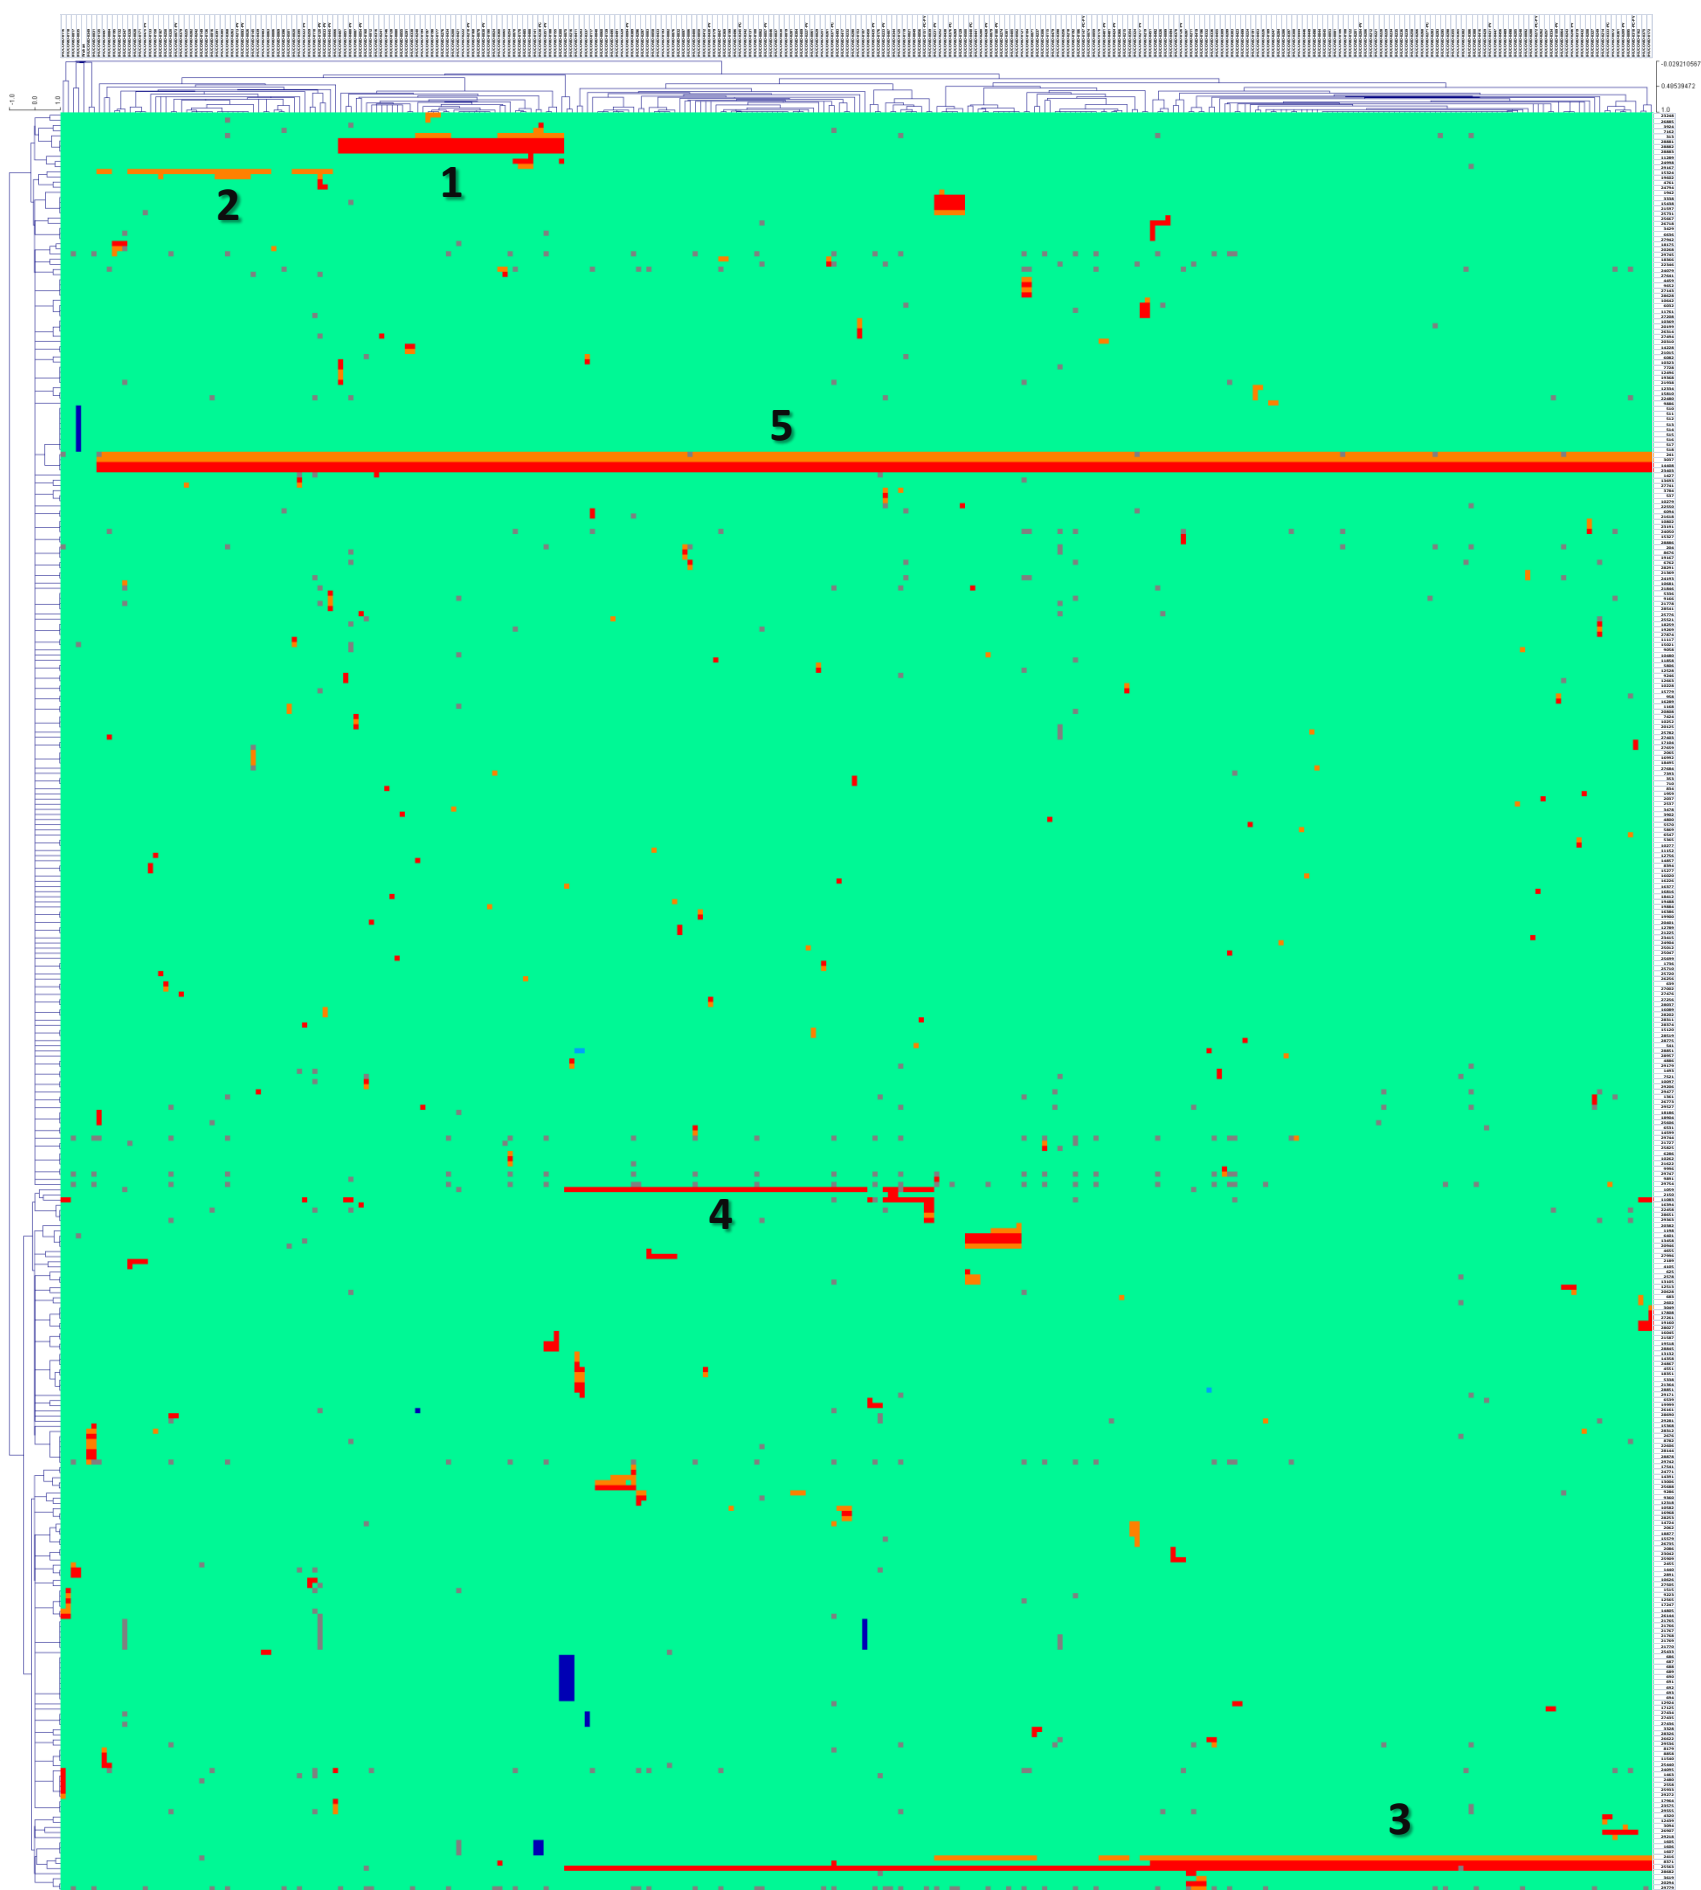



Tree scale: 0.00001

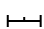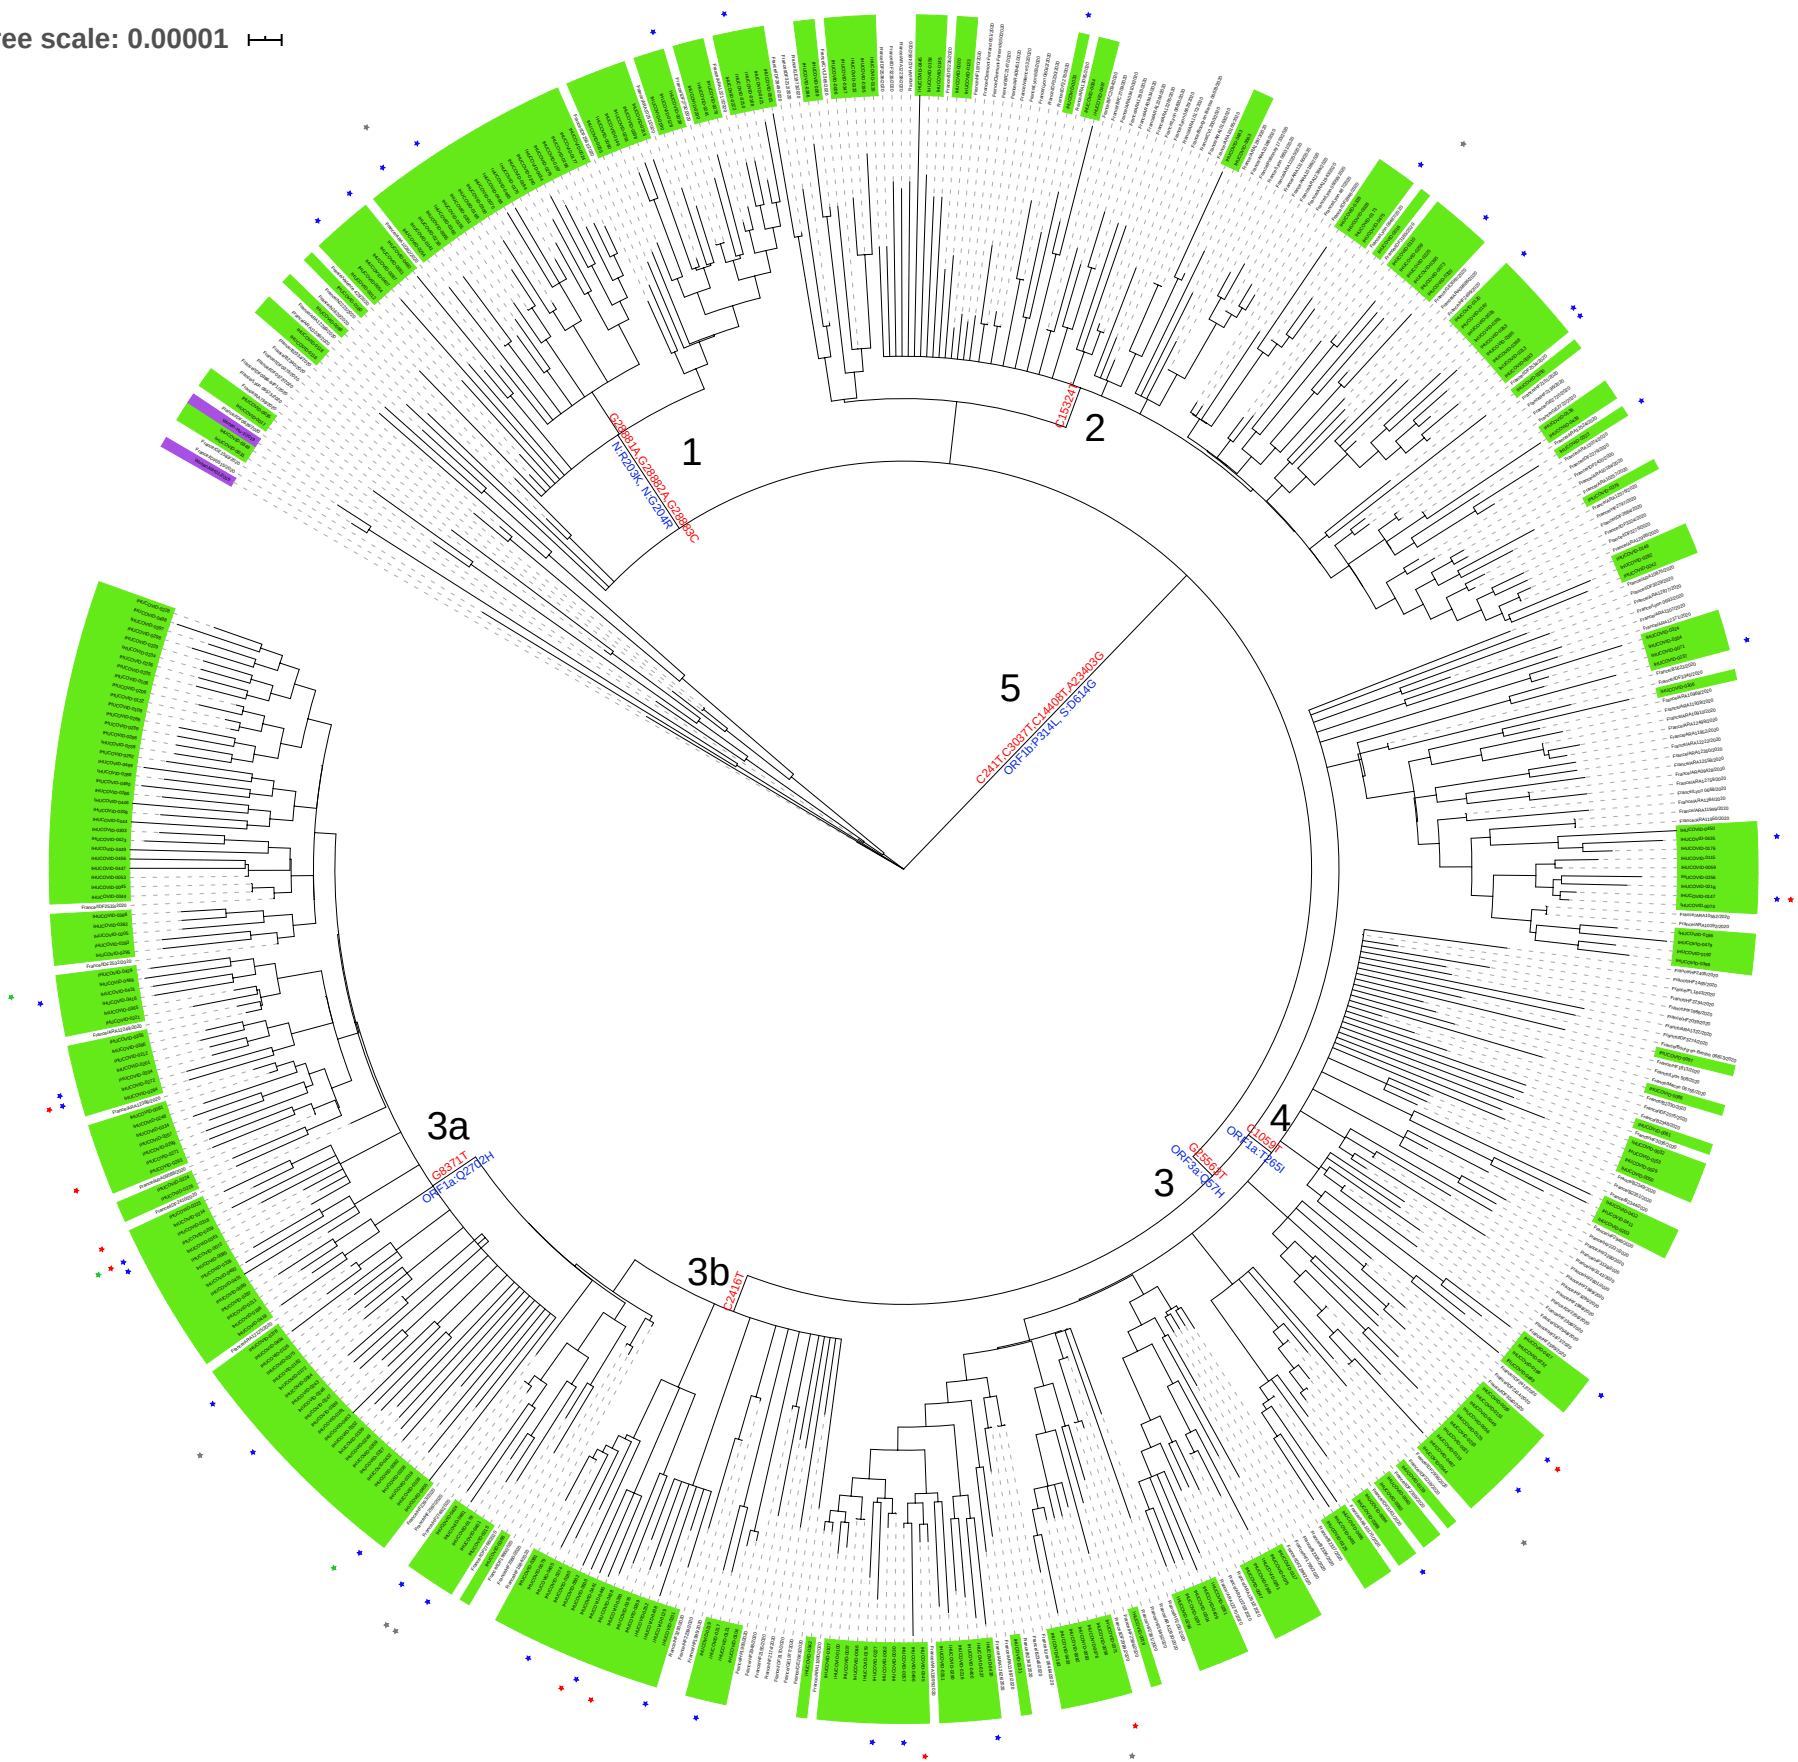

Tree scale: 0.00001

Colored ranges

- Africa
- South America
- Oceania
- Europe
- Asia
- North America

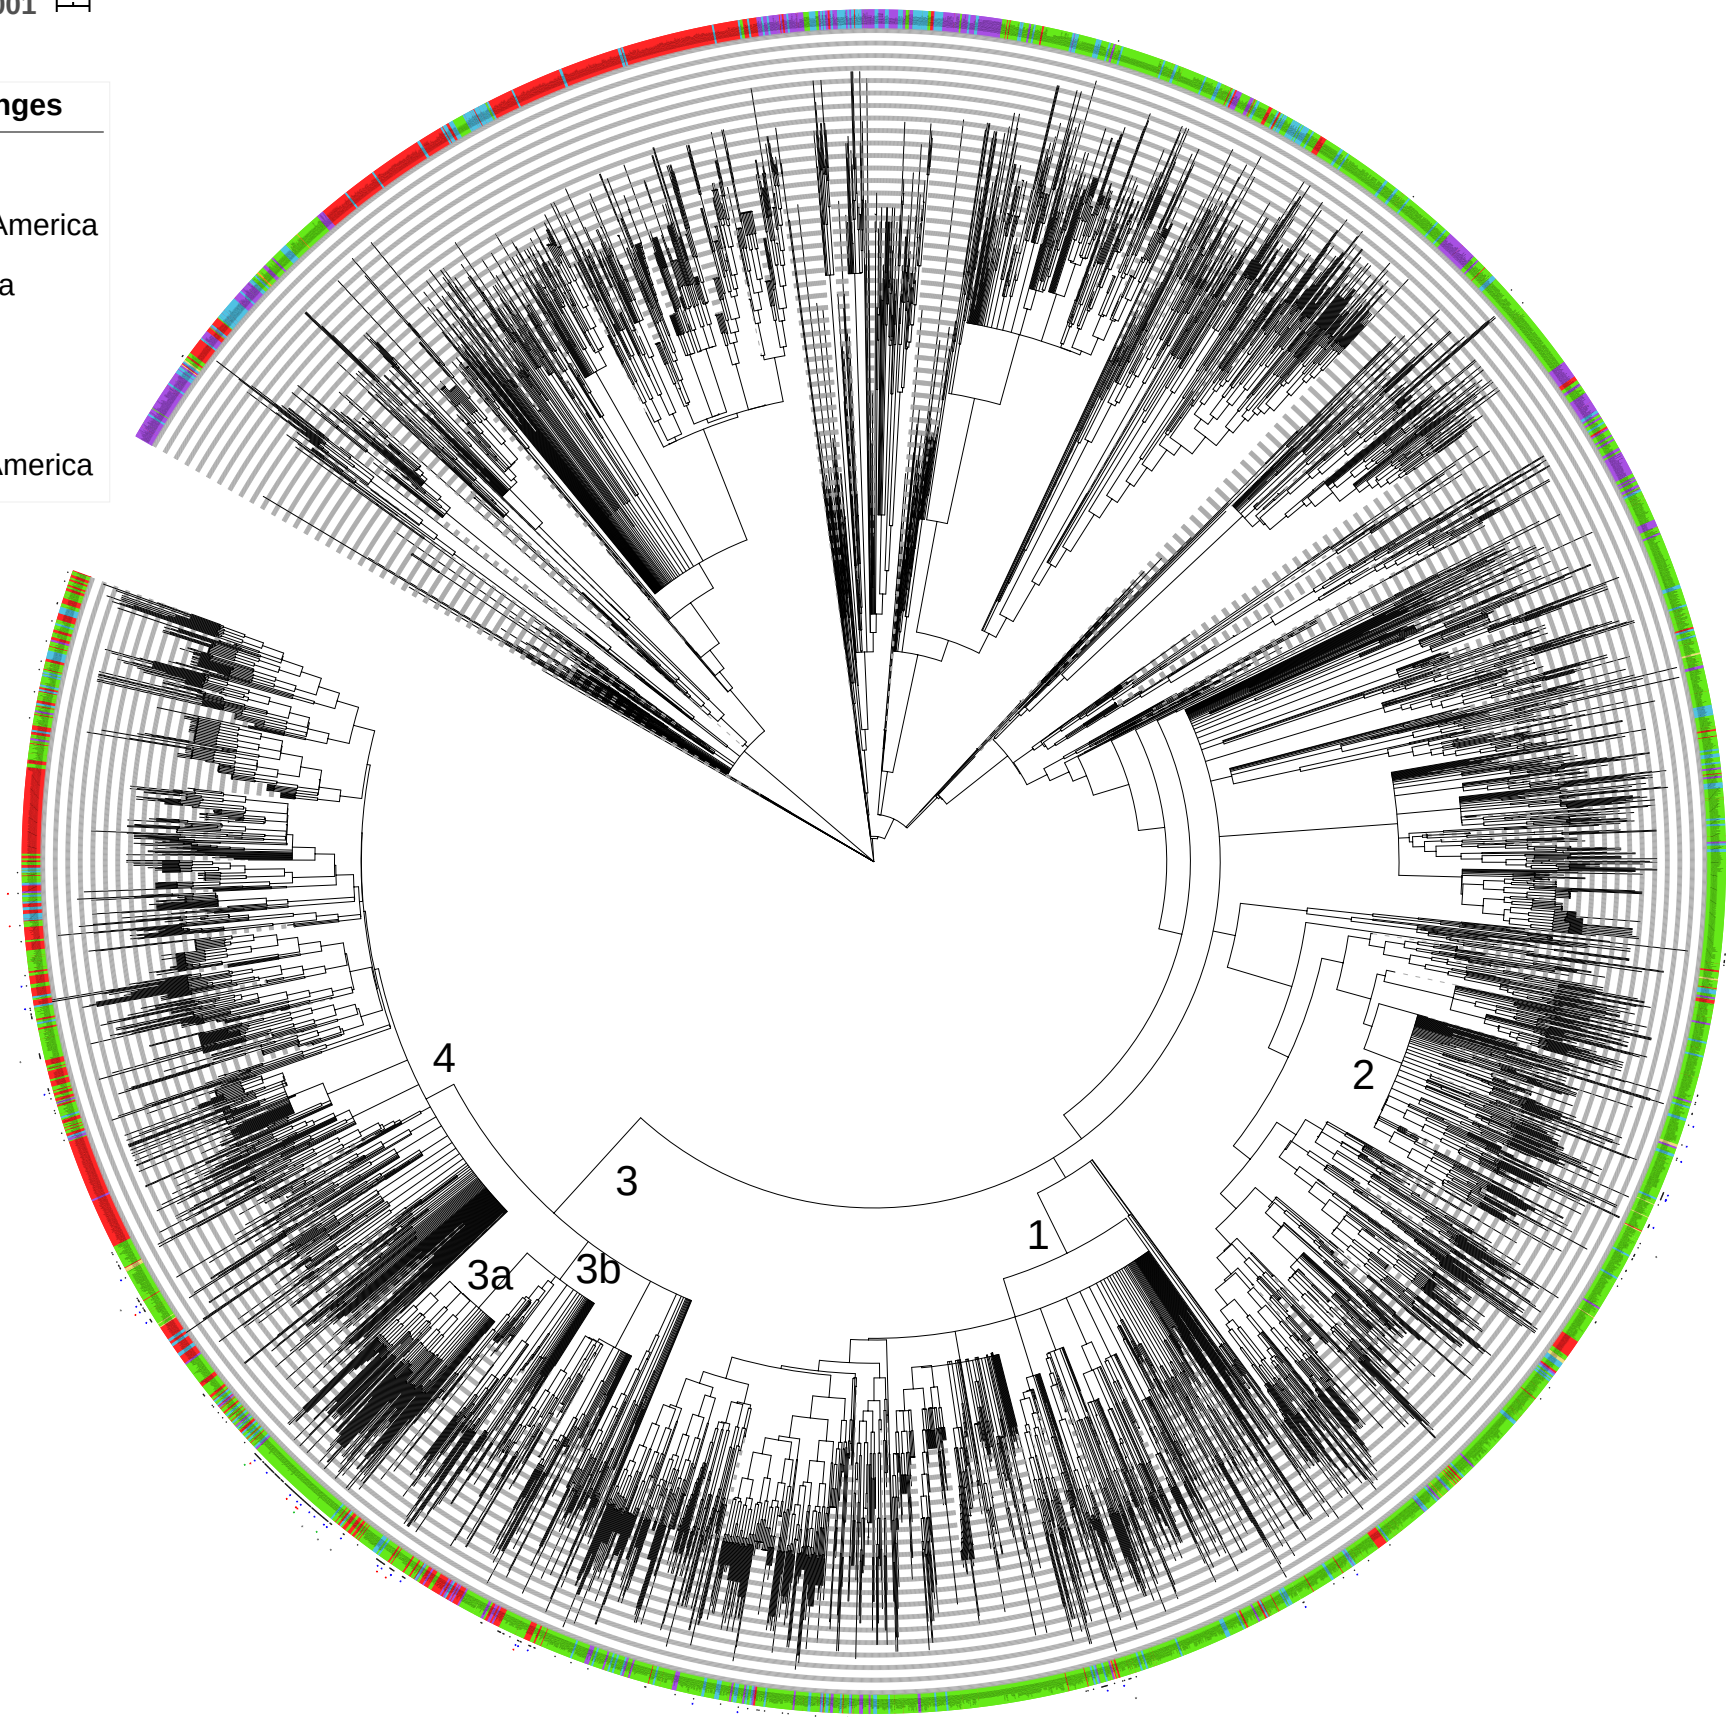



|                          | <i>Nb S</i> | <i>Nb NS</i> | <i>Deletion event</i> |
|--------------------------|-------------|--------------|-----------------------|
| <b>SARS-CoV-2 genome</b> | 126         | 178          | 6                     |
| <b>nsp1</b>              | 3           | 5            | 2                     |
| <b>nsp2</b>              | 11          | 17           | 1                     |
| <b>nsp3</b>              | 17          | 27           | 0                     |
| <b>nsp4</b>              | 6           | 7            | 0                     |
| <b>nsp5</b>              | 9           | 5            | 0                     |
| <b>nsp6</b>              | 1           | 5            | 0                     |
| <b>nsp7</b>              | 0           | 1            | 0                     |
| <b>nsp8</b>              | 3           | 5            | 0                     |
| <b>nsp9</b>              | 1           | 3            | 0                     |
| <b>nsp10</b>             | 2           | 0            | 0                     |
| <b>nsp12a</b>            | 0           | 1            | 0                     |
| <b>nsp12b</b>            | 12          | 11           | 0                     |
| <b>nsp13</b>             | 5           | 8            | 0                     |
| <b>nsp14</b>             | 9           | 7            | 0                     |
| <b>nsp15</b>             | 6           | 5            | 0                     |
| <b>nsp16</b>             | 4           | 2            | 0                     |
| <b>S (spike protein)</b> | 12          | 18           | 1                     |
| <b>ORF3a</b>             | 4           | 13           | 1                     |
| <b>E (envelope)</b>      | 1           | 1            | 0                     |
| <b>M (membrane)</b>      | 4           | 4            | 0                     |
| <b>ORF6</b>              | 0           | 3            | 0                     |
| <b>ORF7a</b>             | 2           | 5            | 1                     |
| <b>ORF7b</b>             | 0           | 1            | 0                     |
| <b>ORF8</b>              | 3           | 4            | 0                     |
| <b>N (nucleocapsid)</b>  | 11          | 20           | 0                     |

*S*: synonymous mutation; *NS* : nonsynonymous mutation

**Table 1. Mutational events detected in the 309 SARS-CoV-2 genomes as compared to the reference Wuhan coronavirus.**

| Position genome | Region/ gene | Mutation nt | Mutation aa | Nb isolates |
|-----------------|--------------|-------------|-------------|-------------|
| 204             | 5UTR         | G>T         |             | 1           |
| 241             | 5UTR         | C>T         |             | 297         |
| 313             | nsp1         | CTC>CTT     | L           | 20          |
| 353             | nsp1         | GGC>AGC     | G30S        | 1           |
| 510             | nsp1         | GGT>X       |             | 1           |
| 511             | nsp1         | GGT>X       |             | 1           |
| 512             | nsp1         | CAT>X       |             | 1           |
| 513             | nsp1         | CAT>X       |             | 1           |
| 514             | nsp1         | CAT>X       |             | 1           |
| 515             | nsp1         | GTT>X       |             | 1           |
| 516             | nsp1         | GTT>X       |             | 1           |
| 517             | nsp1         | GTT>X       |             | 1           |
| 518             | nsp1         | ATG>X       |             | 1           |
| 537             | nsp1         | GAA>GGA     | E91G        | 1           |
| 541             | nsp1         | CTC>CTT     | L           | 1           |
| 625             | nsp1         | AAG>AAT     | K120N       | 1           |
| 639             | nsp1         | AAG>AGG     | K125R       | 1           |
| 683             | nsp1         | CTA>TTA     | L           | 2           |
| 686             | nsp1         | AAG>X       |             | 3           |
| 687             | nsp1         | AAG>X       |             | 3           |
| 688             | nsp1         | AAG>X       |             | 3           |
| 689             | nsp1         | TCA>X       |             | 3           |
| 690             | nsp1         | TCA>X       |             | 3           |
| 691             | nsp1         | TCA>X       |             | 3           |
| 692             | nsp1         | TTT>X       |             | 3           |
| 693             | nsp1         | TTT>X       |             | 3           |
| 694             | nsp1         | TTT>X       |             | 3           |
| 710             | nsp1         | CTT>ATT     | L149I       | 1           |

|      |      |         |       |     |
|------|------|---------|-------|-----|
| 834  | nsp2 | TTC>TGC | F10C  | 1   |
| 958  | nsp2 | TGC>TGT | C     | 1   |
| 1059 | nsp2 | ACC>ATC | T85I  | 68  |
| 1168 | nsp2 | CGA>CGG | R     | 1   |
| 1198 | nsp2 | GAA>GAG | E     | 6   |
| 1361 | nsp2 | GTT>TTT | V186F | 1   |
| 1427 | nsp2 | CAT>TAT | H208Y | 1   |
| 1440 | nsp2 | GGC>GAC | G212D | 2   |
| 1463 | nsp2 | GGT>AGT | G220S | 1   |
| 1493 | nsp2 | GTG>ATG | V230M | 1   |
| 1515 | nsp2 | CAT>CGT | H237R | 1   |
| 1605 | nsp2 | AAT>X   |       | 2   |
| 1606 | nsp2 | AAT>X   |       | 2   |
| 1607 | nsp2 | GAC>X   |       | 2   |
| 1736 | nsp2 | GTG>ATG | V311M | 1   |
| 1942 | nsp2 | GTG>GTT | V     | 1   |
| 1959 | nsp2 | GCC>GTC | A385V | 1   |
| 2037 | nsp2 | GCT>GTT | A411V | 1   |
| 2062 | nsp2 | GCC>GCT | A     | 2   |
| 2065 | nsp2 | TAC>TAT | Y     | 1   |
| 2086 | nsp2 | CAG>CAT | Q427H | 1   |
| 2150 | nsp2 | GAT>AAT | D449N | 2   |
| 2189 | nsp2 | CTT>TTT | L462F | 4   |
| 2416 | nsp2 | TAC>TAT | Y     | 126 |
| 2455 | nsp2 | CTC>CTT | L     | 1   |
| 2480 | nsp2 | ATT>GTT | I559V | 1   |
| 2537 | nsp2 | TTG>CTG | L     | 1   |
| 2558 | nsp2 | CCA>TCA | P585S | 1   |
| 2578 | nsp2 | AGT>AGC | S     | 3   |
| 2602 | nsp2 | GTT>GTG | V     | 1   |
| 2676 | nsp2 | CCT>CTT | P624L | 2   |

|      |      |         |        |     |
|------|------|---------|--------|-----|
| 2891 | nsp3 | GCA>ACA | A58T   | 2   |
| 3037 | nsp3 | TTC>TTT | F      | 303 |
| 3049 | nsp3 | GAT>GAC | D      | 1   |
| 3094 | nsp3 | CCA>CCG | P      | 1   |
| 3328 | nsp3 | CAG>CAT | Q203H  | 2   |
| 3338 | nsp3 | GTG>TTG | V207L  | 6   |
| 3429 | nsp3 | ACA>ATA | T237I  | 1   |
| 3478 | nsp3 | GTT>GTC | V      | 1   |
| 3619 | nsp3 | GTC>GTT | V      | 2   |
| 3784 | nsp3 | GTC>GTT | V      | 2   |
| 3902 | nsp3 | CCA>TCA | P395S  | 1   |
| 3924 | nsp3 | CCT>CTT | P402L  | 1   |
| 4105 | nsp3 | AAG>AAT | K462N  | 1   |
| 4320 | nsp3 | GCC>GTC | A534V  | 2   |
| 4459 | nsp3 | ATA>ATC | I      | 2   |
| 4551 | nsp3 | ACA>ATA | T611I  | 3   |
| 4655 | nsp3 | CGG>TGG | R646W  | 1   |
| 4761 | nsp3 | GAA>GGA | E681G  | 1   |
| 4800 | nsp3 | AAA>AGA | K694R  | 1   |
| 4886 | nsp3 | CCT>TCT | P723S  | 1   |
| 5336 | nsp3 | AAT>GAT | N873D  | 1   |
| 5338 | nsp3 | AAT>AAC | N      | 2   |
| 5365 | nsp3 | TAC>TAT | Y      | 1   |
| 5570 | nsp3 | ATG>GTG | M951V  | 1   |
| 5806 | nsp3 | TGC>TGT | C      | 1   |
| 5869 | nsp3 | TAC>TAT | Y      | 1   |
| 6032 | nsp3 | GCA>ACA | A1105T | 2   |
| 6082 | nsp3 | GAT>GAC | D      | 1   |
| 6094 | nsp3 | CAG>CAT | Q1125H | 1   |
| 6286 | nsp3 | ACC>ACT | T      | 1   |
| 6401 | nsp3 | CCA>TCA | P1228S | 11  |

|              |      |         |        |     |
|--------------|------|---------|--------|-----|
| <b>6531</b>  | nsp3 | GAG>GTG | E1271V | 1   |
| <b>6539</b>  | nsp3 | CAC>TAC | H1274Y | 1   |
| <b>6547</b>  | nsp3 | GAT>GAC | D      | 1   |
| <b>6636</b>  | nsp3 | ACT>ATT | T1306I | 1   |
| <b>6762</b>  | nsp3 | ACT>ATT | T1348I | 1   |
| <b>7162</b>  | nsp3 | GAC>GAT | D      | 2   |
| <b>7393</b>  | nsp3 | CCG>CCT | P      | 1   |
| <b>7424</b>  | nsp3 | TTT>GTT | F1569V | 1   |
| <b>7521</b>  | nsp3 | ACA>ATA | T1601I | 1   |
| <b>7728</b>  | nsp3 | TCT>TTT | S1670F | 1   |
| <b>8179</b>  | nsp3 | CGG>CGT | R      | 1   |
| <b>8371</b>  | nsp3 | CAG>CAT | Q1884H | 100 |
| <b>8394</b>  | nsp3 | GCT>GTT | A1892V | 1   |
| <b>8676</b>  | nsp4 | AGT>ATT | S41I   | 1   |
| <b>8782</b>  | nsp4 | AGC>AGT | S      | 2   |
| <b>8858</b>  | nsp4 | GTC>ATC | V102I  | 1   |
| <b>9058</b>  | nsp4 | CCA>CCG | P      | 1   |
| <b>9166</b>  | nsp4 | ACC>ACT | T      | 1   |
| <b>9223</b>  | nsp4 | CAC>CAT | H      | 1   |
| <b>9246</b>  | nsp4 | GCT>GTT | A231V  | 1   |
| <b>9286</b>  | nsp4 | AAC>AAT | N      | 5   |
| <b>9360</b>  | nsp4 | ACA>ATA | T269I  | 2   |
| <b>9652</b>  | nsp4 | ATG>ATT | M366I  | 2   |
| <b>9886</b>  | nsp4 | TAC>TAT | Y      | 2   |
| <b>9891</b>  | nsp4 | GCT>GTT | A446V  | 1   |
| <b>9996</b>  | nsp4 | TCA>TTA | S481L  | 1   |
| <b>10097</b> | nsp5 | GGT>AGT | G15S   | 1   |
| <b>10228</b> | nsp5 | CTC>CTT | L      | 1   |
| <b>10252</b> | nsp5 | TTC>TTT | F      | 1   |
| <b>10262</b> | nsp5 | GCT>TCT | A70S   | 1   |
| <b>10277</b> | nsp5 | CTC>TTC | L75F   | 1   |

|              |        |         |       |    |
|--------------|--------|---------|-------|----|
| <b>10279</b> | nsp5   | CTC>CTT | L     | 1  |
| <b>10323</b> | nsp5   | AAG>AGG | K90R  | 2  |
| <b>10369</b> | nsp5   | CGC>CGT | R     | 1  |
| <b>10480</b> | nsp5   | AAT>AAC | N     | 1  |
| <b>10582</b> | nsp5   | GAC>GAT | D     | 4  |
| <b>10626</b> | nsp5   | GCA>GTA | A191V | 2  |
| <b>10642</b> | nsp5   | ACG>ACT | T     | 1  |
| <b>10681</b> | nsp5   | TAC>TAT | Y     | 1  |
| <b>10802</b> | nsp5   | CTA>TTA | L     | 1  |
| <b>11083</b> | nsp6   | TTG>TTT | L37F  | 19 |
| <b>11117</b> | nsp6   | ATT>GTT | I49V  | 1  |
| <b>11152</b> | nsp6   | GTC>GTT | V     | 1  |
| <b>11289</b> | nsp6   | TCT>TTT | S106F | 1  |
| <b>11540</b> | nsp6   | GTT>TTT | V190F | 1  |
| <b>11761</b> | nsp6   | AAG>AAT | K263N | 2  |
| <b>11858</b> | nsp7   | GTA>ATA | V6I   | 1  |
| <b>12318</b> | nsp8   | TCT>TAT | S76Y  | 1  |
| <b>12334</b> | nsp8   | GCA>GCT | A     | 2  |
| <b>12439</b> | nsp8   | CCC>CCT | P     | 1  |
| <b>12496</b> | nsp8   | TAT>TAC | Y     | 1  |
| <b>12513</b> | nsp8   | ACG>ATG | T141M | 3  |
| <b>12528</b> | nsp8   | ACA>ATA | T146I | 1  |
| <b>12565</b> | nsp8   | CAG>CAT | Q158H | 1  |
| <b>12663</b> | nsp8   | GCC>GTC | A191V | 1  |
| <b>12756</b> | nsp9   | ACT>ATT | T24I  | 1  |
| <b>12789</b> | nsp9   | ACA>ATA | T35I  | 1  |
| <b>12924</b> | nsp9   | CCT>CTT | P80L  | 2  |
| <b>13006</b> | nsp9   | GCT>GCC | A     | 7  |
| <b>13105</b> | nsp10  | TAC>TAT | Y     | 3  |
| <b>13132</b> | nsp10  | CAA>CAG | Q     | 1  |
| <b>13458</b> | nsp12a | TCG>TTG | S6L   | 11 |

|              |        |         |       |     |
|--------------|--------|---------|-------|-----|
| <b>13693</b> | nsp12b | ACA>TCA | T76S  | 1   |
| <b>14228</b> | nsp12b | AAG>AGG | K254R | 2   |
| <b>14358</b> | nsp12b | TGC>TGT | C     | 1   |
| <b>14391</b> | nsp12b | TTC>TTT | F     | 5   |
| <b>14408</b> | nsp12b | CCT>CTT | P314L | 303 |
| <b>14599</b> | nsp12b | CTA>TTA | L     | 1   |
| <b>14724</b> | nsp12b | TTC>TTT | F     | 3   |
| <b>14805</b> | nsp12b | TAC>TAT | Y     | 2   |
| <b>14857</b> | nsp12b | GTT>TTT | V464F | 1   |
| <b>15021</b> | nsp12b | CTT>CTC | L     | 1   |
| <b>15120</b> | nsp12b | GTC>GTT | V     | 1   |
| <b>15277</b> | nsp12b | CAC>TAC | H604Y | 1   |
| <b>15324</b> | nsp12b | AAC>AAT | N     | 39  |
| <b>15327</b> | nsp12b | ATG>ATT | M620I | 1   |
| <b>15368</b> | nsp12b | ACA>ATA | T634I | 1   |
| <b>15438</b> | nsp12b | ATG>ATT | M657I | 6   |
| <b>15579</b> | nsp12b | AAC>AAT | N     | 1   |
| <b>15779</b> | nsp12b | AAG>AGG | K771R | 1   |
| <b>15810</b> | nsp12b | AAC>AAT | N     | 1   |
| <b>16020</b> | nsp12b | GTG>GTA | V     | 1   |
| <b>16045</b> | nsp12b | CTT>TTT | L860F | 1   |
| <b>16089</b> | nsp12b | TTG>TTA | L     | 1   |
| <b>16226</b> | nsp12b | ACA>ATA | T920I | 1   |
| <b>16289</b> | nsp13  | GCT>GTT | A18V  | 1   |
| <b>16377</b> | nsp13  | CCG>CCT | P     | 1   |
| <b>16386</b> | nsp13  | TGC>TGT | C     | 1   |
| <b>16394</b> | nsp13  | CCA>CTA | P53L  | 3   |
| <b>16816</b> | nsp13  | CAA>AAA | Q194K | 1   |
| <b>16968</b> | nsp13  | GAG>GAT | E244D | 2   |
| <b>16992</b> | nsp13  | TTA>TTG | L     | 1   |
| <b>17104</b> | nsp13  | CAT>TAT | H290Y | 1   |

|       |       |         |       |   |
|-------|-------|---------|-------|---|
| 17125 | nsp13 | CTC>TTC | L297F | 2 |
| 17247 | nsp13 | CGT>CGC | R     | 1 |
| 17541 | nsp13 | GAC>GAT | D     | 1 |
| 17808 | nsp13 | AAG>AAT | K524N | 1 |
| 17964 | nsp13 | ATG>ATA | M576I | 1 |
| 18175 | nsp14 | CCT>TCT | P46S  | 3 |
| 18186 | nsp14 | ATG>ATT | M49I  | 1 |
| 18259 | nsp14 | ATC>GTC | I74V  | 1 |
| 18351 | nsp14 | AAT>AAC | N     | 3 |
| 18366 | nsp14 | CTA>CTG | L     | 3 |
| 18412 | nsp14 | GTT>TTT | V125F | 1 |
| 18495 | nsp14 | CTT>CTC | L     | 1 |
| 18877 | nsp14 | CTA>TTA | L     | 2 |
| 18904 | nsp14 | CGT>TGT | R289C | 1 |
| 19160 | nsp14 | TCT>TTT | S374F | 3 |
| 19167 | nsp14 | AAA>AAG | K     | 1 |
| 19269 | nsp14 | AAC>AAT | N     | 1 |
| 19368 | nsp14 | CCA>CCG | P     | 1 |
| 19488 | nsp14 | GTC>GTT | V     | 1 |
| 19518 | nsp14 | TTG>TTT | L493F | 3 |
| 19602 | nsp14 | AAC>AAT | N     | 9 |
| 19884 | nsp15 | TAC>TAT | Y     | 1 |
| 19900 | nsp15 | GCA>ACA | A94T  | 1 |
| 19999 | nsp15 | GTT>TTT | V127F | 3 |
| 20125 | nsp15 | GGA>CGA | G169R | 1 |
| 20199 | nsp15 | TAC>TAT | Y     | 1 |
| 20268 | nsp15 | TTA>TTG | L     | 3 |
| 20294 | nsp15 | TAT>TGT | Y225C | 4 |
| 20310 | nsp15 | TAT>TAC | Y     | 2 |
| 20382 | nsp15 | CTA>CTT | L     | 1 |
| 20401 | nsp15 | TCA>CCA | S261P | 1 |

|       |       |         |       |     |
|-------|-------|---------|-------|-----|
| 20628 | nsp15 | GGC>GGT | G     | 1   |
| 20808 | nsp16 | CTG>CTA | L     | 1   |
| 20946 | nsp16 | GTC>GTT | V     | 11  |
| 21015 | nsp16 | CAT>CAC | H     | 2   |
| 21225 | nsp16 | TGG>TGT | W189C | 1   |
| 21364 | nsp16 | CCA>TCA | P236S | 2   |
| 21369 | nsp16 | ATT>ATC | I     | 1   |
| 21587 | S     | CCA>TCA | P9S   | 1   |
| 21597 | S     | TCT>TTT | S12F  | 6   |
| 21618 | S     | ACA>ATA | T19I  | 1   |
| 21622 | S     | ACC>ACT | T     | 1   |
| 21727 | S     | TTC>TTT | F     | 1   |
| 21765 | S     | ATA>X   |       | 1   |
| 21766 | S     | ATA>X   |       | 1   |
| 21767 | S     | CAT>X   |       | 1   |
| 21768 | S     | CAT>X   |       | 1   |
| 21769 | S     | CAT>X   |       | 1   |
| 21770 | S     | GTC>X   |       | 1   |
| 21778 | S     | GGG>GGA | G     | 1   |
| 21846 | S     | ACT>ATT | T95I  | 1   |
| 21938 | S     | GTT>TTT | V126F | 1   |
| 22346 | S     | GCT>TCT | A262S | 1   |
| 22458 | S     | ACA>ATA | T299I | 2   |
| 22480 | S     | TTC>TTT | F     | 1   |
| 22550 | S     | CCT>TCT | P330S | 1   |
| 22606 | S     | GCA>GCT | A     | 2   |
| 23042 | S     | TCA>GCA | S494A | 1   |
| 23191 | S     | TTC>TTT | F     | 1   |
| 23248 | S     | TTC>TTT | F     | 3   |
| 23403 | S     | GAT>GGT | D614G | 303 |
| 23415 | S     | ACA>ATA | T618I | 1   |

|       |       |         |        |     |
|-------|-------|---------|--------|-----|
| 23575 | S     | TGC>TGT | C      | 1   |
| 24050 | S     | GAT>CAT | D830H  | 1   |
| 24079 | S     | GAT>GAC | D      | 2   |
| 24095 | S     | GCT>TCT | A845S  | 2   |
| 24193 | S     | CTG>CTA | L      | 1   |
| 24771 | S     | GCA>GTA | A1070V | 1   |
| 24794 | S     | GCT>TCT | A1078S | 2   |
| 24867 | S     | TGG>TTG | W1102L | 1   |
| 24904 | S     | ATC>ATT | I      | 1   |
| 24998 | S     | GAC>TAC | D1146Y | 5   |
| 25012 | S     | GAG>GAA | E      | 1   |
| 25047 | S     | CCA>CTA | P1162L | 1   |
| 25433 | ORF3a | ACT>ATT | T14I   | 2   |
| 25440 | ORF3a | AAG>AAT | K16N   | 2   |
| 25521 | ORF3a | TTC>TTT | F      | 1   |
| 25563 | ORF3a | CAG>CAT | Q57H   | 211 |
| 25606 | ORF3a | GCA>TCA | A72S   | 1   |
| 25667 | ORF3a | TCA>TTA | S92L   | 1   |
| 25688 | ORF3a | GCT>GTT | A99V   | 8   |
| 25699 | ORF3a | GCC>TCC | A103S  | 1   |
| 25710 | ORF3a | CTC>CTT | L      | 1   |
| 25720 | ORF3a | GCT>TCT | A110S  | 1   |
| 25731 | ORF3a | TAC>TAT | Y      | 6   |
| 25776 | ORF3a | TGG>TGT | W128C  | 1   |
| 25782 | ORF3a | TGC>TGT | C      | 1   |
| 25825 | ORF3a | TAT>CAT | Y145H  | 1   |
| 25909 | ORF3a | GAT>TAT | D173Y  | 3   |
| 25933 | ORF3a | GAA>AAA | E181K  | 1   |
| 26144 | ORF3a | GGT>GTT | G251V  | 2   |
| 26161 | ORF3a | AAT>X   |        | 1   |
| 26256 | E     | TTC>TTT | F      | 1   |

|       |       |         |       |   |
|-------|-------|---------|-------|---|
| 26314 | E     | GTG>TTG | V24L  | 1 |
| 26622 | M     | CTT>TTT | L34F  | 2 |
| 26718 | M     | GTG>TTG | V66L  | 4 |
| 26735 | M     | TAC>TAT | Y     | 1 |
| 26773 | M     | ATG>ACG | M84T  | 1 |
| 26885 | M     | AAC>AAT | N     | 1 |
| 26907 | M     | CTG>ATG | L129M | 7 |
| 27002 | M     | GAC>GAT | D     | 1 |
| 27143 | M     | AAC>AAT | N     | 2 |
| 27208 | ORF6  | CAT>TAT | H3Y   | 2 |
| 27256 | ORF6  | ATG>TTG | M19L  | 1 |
| 27261 | ORF6  | AGG>AGT | R20S  | 1 |
| 27403 | ORF7a | ATT>GTT | I4V   | 1 |
| 27434 | ORF7a | ACT>X   |       | 1 |
| 27435 | ORF7a | ACT>X   |       | 1 |
| 27436 | ORF7a | TGT>X   |       | 1 |
| 27476 | ORF7a | ACA>ATA | T28I  | 1 |
| 27494 | ORF7a | CCT>CTT | P34L  | 2 |
| 27505 | ORF7a | GGA>TGA | G38*  | 1 |
| 27641 | ORF7a | TCA>TTA | S83L  | 1 |
| 27659 | ORF7a | AGA>ATA | R89I  | 1 |
| 27684 | ORF7a | TAC>TAT | Y     | 1 |
| 27741 | ORF7a | CTC>CTA | L     | 2 |
| 27874 | ORF7b | ACT>ATT | T40I  | 1 |
| 27942 | ORF8  | CAC>TAC | H17Y  | 1 |
| 27996 | ORF8  | GAC>TAC | D35Y  | 6 |
| 28027 | ORF8  | TGG>TTG | W45L  | 3 |
| 28037 | ORF8  | AGA>AGG | R     | 1 |
| 28144 | ORF8  | TTA>TCA | L84S  | 2 |
| 28202 | ORF8  | TCG>TCA | S     | 1 |
| 28253 | ORF8  | TTC>TTT | F     | 2 |

|       |   |         |       |    |
|-------|---|---------|-------|----|
| 28291 | N | CCC>CCT | P     | 1  |
| 28311 | N | CCC>CTC | P13L  | 1  |
| 28312 | N | CCC>CCT | P     | 4  |
| 28326 | N | GGT>GTT | G18V  | 1  |
| 28374 | N | GGG>GAG | G34E  | 1  |
| 28519 | N | GAC>GAT | D     | 1  |
| 28541 | N | GCT>ACT | A90T  | 1  |
| 28628 | N | GCT>TCT | A119S | 2  |
| 28651 | N | AAC>AAT | N     | 2  |
| 28682 | N | GGA>AGA | G137R | 2  |
| 28690 | N | TTG>TTT | L139F | 2  |
| 28775 | N | CCA>TCA | P168S | 1  |
| 28845 | N | CGC>CTC | R191L | 3  |
| 28851 | N | AGT>AAT | S193N | 2  |
| 28851 | N | AGT>ATT | S193I | 1  |
| 28878 | N | AGT>AAT | S202N | 2  |
| 28881 | N | AGG>AAA | R203K | 44 |
| 28882 | N | AGG>AAA | R203K | 44 |
| 28883 | N | GGA>CGA | G204R | 44 |
| 28886 | N | ACT>GCT | T205A | 1  |
| 28957 | N | AAC>AAT | N     | 1  |
| 29167 | N | TAC>TAT | Y     | 3  |
| 29171 | N | CAT>TAT | H300Y | 1  |
| 29179 | N | CCG>CCT | P     | 1  |
| 29206 | N | GCT>GCA | A     | 1  |
| 29218 | N | TTC>TTT | F     | 1  |
| 29272 | N | TAC>TAT | Y     | 1  |
| 29281 | N | GCC>GCT | A     | 1  |
| 29363 | N | CCA>TCA | P364S | 2  |
| 29477 | N | GAT>TAT | D402Y | 1  |
| 29527 | N | CAG>CAT | Q418H | 1  |

|       |      |     |  |   |
|-------|------|-----|--|---|
| 29536 |      | T>C |  | 1 |
| 29555 |      | C>T |  | 1 |
| 29742 | 3UTR | G>A |  | 1 |
| 29744 | 3UTR | G>T |  | 1 |
| 29745 | 3UTR | G>T |  | 1 |
| 29747 | 3UTR | G>T |  | 1 |
| 29754 | 3UTR | C>T |  | 1 |
| 29779 | 3UTR | G>C |  | 3 |

**Table 2. Detailed mutations detected in the 309 SARS-CoV-2 genomes from French patients**
